# Supplementary material
Source: PubMed Central journal article supplement (PMC4586361)
Supplement: NIHMS700707-supplement-Figure.pdf [file NIHMS700707-supplement-Figure.pdf]

Figure 3A.

*Detailed Depiction of the Latent Variable Growth Curve Component of the Latent Variable Model in Figure 1*

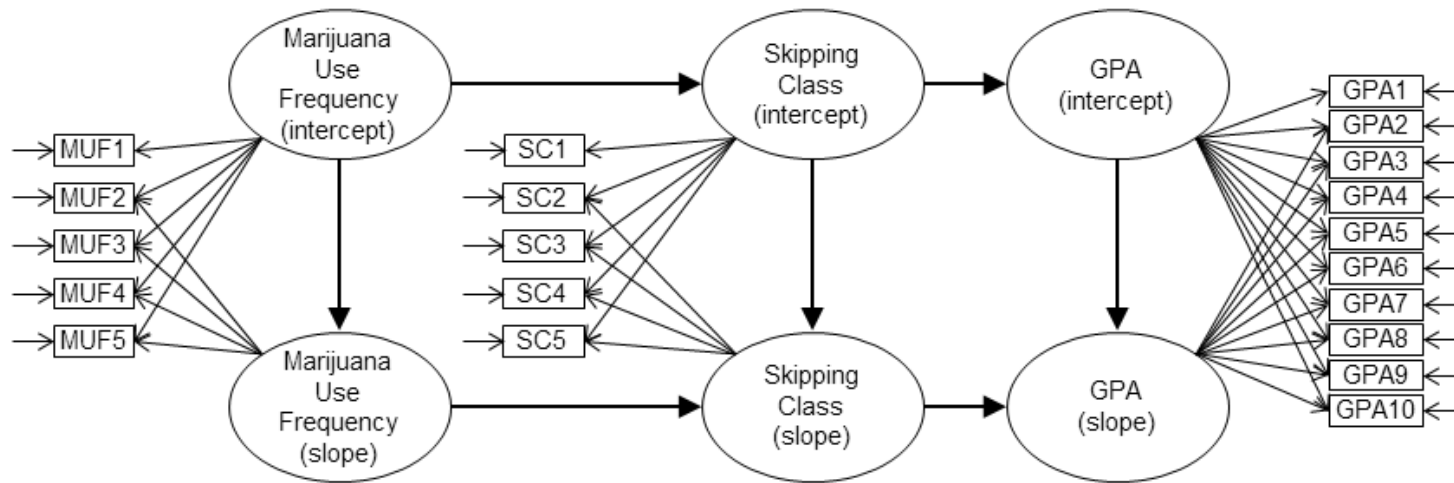

*Note.* Repeated measures for marijuana use frequency (MUF1 to MUF5) and skipping class (SC1 to SC5), both measured annually in academic years 1 through 5, and semester GPA (GPA1 to GPA10) from the first five years of college enrollment, are depicted in relation to their respective latent variables for intercept and slope. Slope growth factors had their time scores fixed at 0, 1, 2, 3 ... while the intercept growth factors had their time scores fixed to 1 at all time points. As such, slopes represent linear growth with equal spacing between points in time, and intercepts are defined as the first observation in time (see Muthén and Muthén, 2012). Because data were censored after college graduation, some individuals did not have data for every observation depicted.
