# Supplementary material
Source: PubMed Central journal article supplement (PMC4586361)
Supplement: NIHMS700707-supplement-Table.pdf [file NIHMS700707-supplement-Table.pdf]

Table 3A.

*Specific Direct and Indirect Paths [b(SE)] between Baseline Covariates, Skipping, and Academic Outcomes from the Final Model*

| Explanatory Variable              | Mediating Path(s)                       | Outcome Variable   | Specific Effect     | Total Indirect      | Total Effect        |
|-----------------------------------|-----------------------------------------|--------------------|---------------------|---------------------|---------------------|
| Male                              | <i>(Direct)</i>                         |                    | <b>3.860 (.655)</b> |                     |                     |
|                                   | Marijuana intercept                     |                    | <b>.538 (.197)</b>  | <b>.538 (.197)</b>  | <b>4.398 (.679)</b> |
| Depressive Symptoms               | <i>(Direct)</i>                         |                    | <b>.181 (.078)</b>  | .036 (.022)         | <b>.218 (.082)</b>  |
|                                   | Marijuana intercept                     |                    | .036 (.022)         |                     |                     |
| Anxiety Symptoms                  | <i>(Direct)</i>                         |                    | <b>-.131 (.056)</b> | <b>-.026 (.013)</b> | <b>-.157 (.063)</b> |
|                                   | Marijuana intercept                     |                    | <b>-.026 (.013)</b> |                     |                     |
| Behavioral Dysregulation          | <i>(Direct)</i>                         |                    | <b>.089 (.029)</b>  |                     | a                   |
| Other Extracurricular Involvement | <i>(Direct)</i>                         |                    | <b>-.372 (.143)</b> |                     |                     |
|                                   | Marijuana intercept                     | Skipping intercept | <b>-.069 (.028)</b> | <b>-.069 (.028)</b> | <b>-.441 (.139)</b> |
| Fraternity/Sorority Involvement   | <i>(Direct)</i>                         |                    | <b>2.474 (.680)</b> |                     | a                   |
| Other Drug Use                    | <i>(Direct)</i>                         |                    | <b>.829 (.368)</b>  | <b>1.027 (.308)</b> | <b>1.856 (.334)</b> |
|                                   | Marijuana intercept                     |                    | <b>1.027 (.308)</b> |                     |                     |
| Alcohol Frequency                 | Marijuana intercept                     |                    | <b>.099 (.033)</b>  | <b>.099 (.033)</b>  | <b>.099 (.033)</b>  |
| Alcohol Quantity                  | <i>(Direct)</i>                         |                    | <b>.330 (.121)</b>  |                     | a                   |
| Parents' Education                | <i>(Direct)</i>                         | Skipping slope     | <b>-.729 (.355)</b> |                     | a                   |
| Male                              | Skipping intercept                      |                    | <b>-.622 (.163)</b> | <b>-.708 (.173)</b> | <b>-.708 (.173)</b> |
|                                   | Marijuana intercept, Skipping intercept |                    | <b>-.087 (.035)</b> |                     |                     |
| White                             | <i>(Direct)</i>                         |                    | <b>3.279 (.417)</b> |                     | a                   |
| Parents' Education                | <i>(Direct)</i>                         | GPA intercept      | <b>1.319 (.517)</b> |                     | a                   |
| Sensation-Seeking                 | <i>(Direct)</i>                         |                    | <b>-.400 (.085)</b> |                     | a                   |

| Explanatory Variable                | Mediating Path(s)                                      | Outcome Variable    | Specific Effect     | Total Indirect      | Total Effect        |                                 |                    |                     |                     |                     |                                         |                    |                                   |                     |                                                        |                                   |                                         |                                     |                     |                     |                                         |                    |                                   |                     |                     |                                         |                     |                                         |                    |                                 |                     |                     |                                      |                                         |                                   |                     |                                                        |                     |                     |                   |                                         |                     |                                         |                     |                     |                    |                     |                     |                     |                                         |                     |                     |                                   |                     |                    |                     |                                                        |                    |                                   |                    |                                                        |                     |              |                 |                     |                     |                |               |                     |                    |                |                     |             |
|-------------------------------------|--------------------------------------------------------|---------------------|---------------------|---------------------|---------------------|---------------------------------|--------------------|---------------------|---------------------|---------------------|-----------------------------------------|--------------------|-----------------------------------|---------------------|--------------------------------------------------------|-----------------------------------|-----------------------------------------|-------------------------------------|---------------------|---------------------|-----------------------------------------|--------------------|-----------------------------------|---------------------|---------------------|-----------------------------------------|---------------------|-----------------------------------------|--------------------|---------------------------------|---------------------|---------------------|--------------------------------------|-----------------------------------------|-----------------------------------|---------------------|--------------------------------------------------------|---------------------|---------------------|-------------------|-----------------------------------------|---------------------|-----------------------------------------|---------------------|---------------------|--------------------|---------------------|---------------------|---------------------|-----------------------------------------|---------------------|---------------------|-----------------------------------|---------------------|--------------------|---------------------|--------------------------------------------------------|--------------------|-----------------------------------|--------------------|--------------------------------------------------------|---------------------|--------------|-----------------|---------------------|---------------------|----------------|---------------|---------------------|--------------------|----------------|---------------------|-------------|
| Depressive Symptoms                 | Skipping intercept                                     | GPA                 | <b>-.029 (.015)</b> | <b>-.035 (.016)</b> | <b>-.035 (.016)</b> |                                 |                    |                     |                     |                     |                                         |                    |                                   |                     |                                                        |                                   |                                         |                                     |                     |                     |                                         |                    |                                   |                     |                     |                                         |                     |                                         |                    |                                 |                     |                     |                                      |                                         |                                   |                     |                                                        |                     |                     |                   |                                         |                     |                                         |                     |                     |                    |                     |                     |                     |                                         |                     |                     |                                   |                     |                    |                     |                                                        |                    |                                   |                    |                                                        |                     |              |                 |                     |                     |                |               |                     |                    |                |                     |             |
|                                     | Marijuana intercept, Skipping intercept                |                     | -.006 (.004)        |                     |                     | Anxiety Symptoms                | Skipping intercept | .021 (.011)         | <b>.025 (.011)</b>  | <b>.025 (.011)</b>  | Marijuana intercept, Skipping intercept | .004 (.002)        | Behavioral Dysregulation          | Skipping intercept  | <b>-.014 (.005)</b>                                    | <b>-.014 (.005)</b>               | <b>-.014 (.005)</b>                     | Living-Learning Program Involvement | <i>(Direct)</i>     | <b>2.199 (.361)</b> |                                         | <sup>a</sup>       | Other Extracurricular Involvement | Skipping intercept  | <b>.060 (.027)</b>  | <b>.071 (.027)</b>                      | <b>.071 (.027)</b>  | Marijuana intercept, Skipping intercept | <b>.011 (.005)</b> | Fraternity/Sorority Involvement | Skipping intercept  | <b>-.399 (.130)</b> | <b>-.399 (.130)</b>                  | <b>-.399 (.130)</b>                     | Alcohol Quantity                  | Skipping intercept  | <b>-.053 (.024)</b>                                    | <b>-.053 (.024)</b> | <b>-.053 (.024)</b> | Alcohol Frequency | Marijuana intercept, Skipping intercept | <b>-.016 (.006)</b> | <b>-.016 (.006)</b>                     | <b>-.016 (.006)</b> | Other Drug Use      | Skipping intercept | -.134 (.074)        | <b>-.299 (.079)</b> | <b>-.299 (.079)</b> | Marijuana intercept, Skipping intercept | <b>-.165 (.058)</b> | Male                | <i>(Direct)</i>                   | <b>-.201 (.042)</b> | <b>.043 (.014)</b> | <b>-.158 (.044)</b> | Marijuana intercept, Marijuana slope                   | -.006 (.004)       | Skipping intercept, GPA intercept | <b>.043 (.012)</b> | Marijuana intercept, Skipping intercept, GPA intercept | <b>.006 (.002)</b>  | White        | <i>(Direct)</i> | <b>.141 (.051)</b>  | <b>-.228 (.037)</b> | -.087 (.067)   | GPA intercept | <b>-.228 (.037)</b> | Parents' Education | Skipping slope | .092 (.049)         | .000 (.060) |
| Anxiety Symptoms                    | Skipping intercept                                     |                     | .021 (.011)         | <b>.025 (.011)</b>  | <b>.025 (.011)</b>  |                                 |                    |                     |                     |                     |                                         |                    |                                   |                     |                                                        |                                   |                                         |                                     |                     |                     |                                         |                    |                                   |                     |                     |                                         |                     |                                         |                    |                                 |                     |                     |                                      |                                         |                                   |                     |                                                        |                     |                     |                   |                                         |                     |                                         |                     |                     |                    |                     |                     |                     |                                         |                     |                     |                                   |                     |                    |                     |                                                        |                    |                                   |                    |                                                        |                     |              |                 |                     |                     |                |               |                     |                    |                |                     |             |
|                                     | Marijuana intercept, Skipping intercept                |                     | .004 (.002)         |                     |                     | Behavioral Dysregulation        | Skipping intercept | <b>-.014 (.005)</b> | <b>-.014 (.005)</b> | <b>-.014 (.005)</b> | Living-Learning Program Involvement     | <i>(Direct)</i>    | <b>2.199 (.361)</b>               |                     | <sup>a</sup>                                           | Other Extracurricular Involvement | Skipping intercept                      | <b>.060 (.027)</b>                  | <b>.071 (.027)</b>  | <b>.071 (.027)</b>  | Marijuana intercept, Skipping intercept | <b>.011 (.005)</b> | Fraternity/Sorority Involvement   | Skipping intercept  | <b>-.399 (.130)</b> | <b>-.399 (.130)</b>                     | <b>-.399 (.130)</b> | Alcohol Quantity                        | Skipping intercept | <b>-.053 (.024)</b>             | <b>-.053 (.024)</b> | <b>-.053 (.024)</b> | Alcohol Frequency                    | Marijuana intercept, Skipping intercept | <b>-.016 (.006)</b>               | <b>-.016 (.006)</b> | <b>-.016 (.006)</b>                                    | Other Drug Use      | Skipping intercept  | -.134 (.074)      | <b>-.299 (.079)</b>                     | <b>-.299 (.079)</b> | Marijuana intercept, Skipping intercept | <b>-.165 (.058)</b> | Male                | <i>(Direct)</i>    | <b>-.201 (.042)</b> | <b>.043 (.014)</b>  | <b>-.158 (.044)</b> | Marijuana intercept, Marijuana slope    | -.006 (.004)        |                     | Skipping intercept, GPA intercept | <b>.043 (.012)</b>  |                    |                     | Marijuana intercept, Skipping intercept, GPA intercept | <b>.006 (.002)</b> | White                             | <i>(Direct)</i>    | <b>.141 (.051)</b>                                     | <b>-.228 (.037)</b> | -.087 (.067) | GPA intercept   | <b>-.228 (.037)</b> | Parents' Education  | Skipping slope | .092 (.049)   | .000 (.060)         | .000 (.060)        | GPA intercept  | <b>-.092 (.036)</b> |             |
| Behavioral Dysregulation            | Skipping intercept                                     |                     | <b>-.014 (.005)</b> | <b>-.014 (.005)</b> | <b>-.014 (.005)</b> |                                 |                    |                     |                     |                     |                                         |                    |                                   |                     |                                                        |                                   |                                         |                                     |                     |                     |                                         |                    |                                   |                     |                     |                                         |                     |                                         |                    |                                 |                     |                     |                                      |                                         |                                   |                     |                                                        |                     |                     |                   |                                         |                     |                                         |                     |                     |                    |                     |                     |                     |                                         |                     |                     |                                   |                     |                    |                     |                                                        |                    |                                   |                    |                                                        |                     |              |                 |                     |                     |                |               |                     |                    |                |                     |             |
| Living-Learning Program Involvement | <i>(Direct)</i>                                        |                     | <b>2.199 (.361)</b> |                     | <sup>a</sup>        |                                 |                    |                     |                     |                     |                                         |                    |                                   |                     |                                                        |                                   |                                         |                                     |                     |                     |                                         |                    |                                   |                     |                     |                                         |                     |                                         |                    |                                 |                     |                     |                                      |                                         |                                   |                     |                                                        |                     |                     |                   |                                         |                     |                                         |                     |                     |                    |                     |                     |                     |                                         |                     |                     |                                   |                     |                    |                     |                                                        |                    |                                   |                    |                                                        |                     |              |                 |                     |                     |                |               |                     |                    |                |                     |             |
| Other Extracurricular Involvement   | Skipping intercept                                     |                     | <b>.060 (.027)</b>  | <b>.071 (.027)</b>  | <b>.071 (.027)</b>  |                                 |                    |                     |                     |                     |                                         |                    |                                   |                     |                                                        |                                   |                                         |                                     |                     |                     |                                         |                    |                                   |                     |                     |                                         |                     |                                         |                    |                                 |                     |                     |                                      |                                         |                                   |                     |                                                        |                     |                     |                   |                                         |                     |                                         |                     |                     |                    |                     |                     |                     |                                         |                     |                     |                                   |                     |                    |                     |                                                        |                    |                                   |                    |                                                        |                     |              |                 |                     |                     |                |               |                     |                    |                |                     |             |
|                                     | Marijuana intercept, Skipping intercept                |                     | <b>.011 (.005)</b>  |                     |                     | Fraternity/Sorority Involvement | Skipping intercept | <b>-.399 (.130)</b> | <b>-.399 (.130)</b> | <b>-.399 (.130)</b> | Alcohol Quantity                        | Skipping intercept | <b>-.053 (.024)</b>               | <b>-.053 (.024)</b> | <b>-.053 (.024)</b>                                    | Alcohol Frequency                 | Marijuana intercept, Skipping intercept | <b>-.016 (.006)</b>                 | <b>-.016 (.006)</b> | <b>-.016 (.006)</b> | Other Drug Use                          | Skipping intercept | -.134 (.074)                      | <b>-.299 (.079)</b> | <b>-.299 (.079)</b> | Marijuana intercept, Skipping intercept | <b>-.165 (.058)</b> | Male                                    | <i>(Direct)</i>    | <b>-.201 (.042)</b>             | <b>.043 (.014)</b>  | <b>-.158 (.044)</b> | Marijuana intercept, Marijuana slope | -.006 (.004)                            | Skipping intercept, GPA intercept | <b>.043 (.012)</b>  | Marijuana intercept, Skipping intercept, GPA intercept | <b>.006 (.002)</b>  | White               | <i>(Direct)</i>   | <b>.141 (.051)</b>                      | <b>-.228 (.037)</b> | -.087 (.067)                            | GPA intercept       | <b>-.228 (.037)</b> | Parents' Education | Skipping slope      | .092 (.049)         | .000 (.060)         | .000 (.060)                             | GPA intercept       | <b>-.092 (.036)</b> |                                   |                     |                    |                     |                                                        |                    |                                   |                    |                                                        |                     |              |                 |                     |                     |                |               |                     |                    |                |                     |             |
| Fraternity/Sorority Involvement     | Skipping intercept                                     |                     | <b>-.399 (.130)</b> | <b>-.399 (.130)</b> | <b>-.399 (.130)</b> |                                 |                    |                     |                     |                     |                                         |                    |                                   |                     |                                                        |                                   |                                         |                                     |                     |                     |                                         |                    |                                   |                     |                     |                                         |                     |                                         |                    |                                 |                     |                     |                                      |                                         |                                   |                     |                                                        |                     |                     |                   |                                         |                     |                                         |                     |                     |                    |                     |                     |                     |                                         |                     |                     |                                   |                     |                    |                     |                                                        |                    |                                   |                    |                                                        |                     |              |                 |                     |                     |                |               |                     |                    |                |                     |             |
| Alcohol Quantity                    | Skipping intercept                                     |                     | <b>-.053 (.024)</b> | <b>-.053 (.024)</b> | <b>-.053 (.024)</b> |                                 |                    |                     |                     |                     |                                         |                    |                                   |                     |                                                        |                                   |                                         |                                     |                     |                     |                                         |                    |                                   |                     |                     |                                         |                     |                                         |                    |                                 |                     |                     |                                      |                                         |                                   |                     |                                                        |                     |                     |                   |                                         |                     |                                         |                     |                     |                    |                     |                     |                     |                                         |                     |                     |                                   |                     |                    |                     |                                                        |                    |                                   |                    |                                                        |                     |              |                 |                     |                     |                |               |                     |                    |                |                     |             |
| Alcohol Frequency                   | Marijuana intercept, Skipping intercept                |                     | <b>-.016 (.006)</b> | <b>-.016 (.006)</b> | <b>-.016 (.006)</b> |                                 |                    |                     |                     |                     |                                         |                    |                                   |                     |                                                        |                                   |                                         |                                     |                     |                     |                                         |                    |                                   |                     |                     |                                         |                     |                                         |                    |                                 |                     |                     |                                      |                                         |                                   |                     |                                                        |                     |                     |                   |                                         |                     |                                         |                     |                     |                    |                     |                     |                     |                                         |                     |                     |                                   |                     |                    |                     |                                                        |                    |                                   |                    |                                                        |                     |              |                 |                     |                     |                |               |                     |                    |                |                     |             |
| Other Drug Use                      | Skipping intercept                                     |                     | -.134 (.074)        | <b>-.299 (.079)</b> | <b>-.299 (.079)</b> |                                 |                    |                     |                     |                     |                                         |                    |                                   |                     |                                                        |                                   |                                         |                                     |                     |                     |                                         |                    |                                   |                     |                     |                                         |                     |                                         |                    |                                 |                     |                     |                                      |                                         |                                   |                     |                                                        |                     |                     |                   |                                         |                     |                                         |                     |                     |                    |                     |                     |                     |                                         |                     |                     |                                   |                     |                    |                     |                                                        |                    |                                   |                    |                                                        |                     |              |                 |                     |                     |                |               |                     |                    |                |                     |             |
|                                     | Marijuana intercept, Skipping intercept                |                     | <b>-.165 (.058)</b> |                     |                     | Male                            | <i>(Direct)</i>    | <b>-.201 (.042)</b> | <b>.043 (.014)</b>  | <b>-.158 (.044)</b> | Marijuana intercept, Marijuana slope    | -.006 (.004)       | Skipping intercept, GPA intercept | <b>.043 (.012)</b>  | Marijuana intercept, Skipping intercept, GPA intercept | <b>.006 (.002)</b>                | White                                   | <i>(Direct)</i>                     | <b>.141 (.051)</b>  | <b>-.228 (.037)</b> | -.087 (.067)                            | GPA intercept      | <b>-.228 (.037)</b>               | Parents' Education  | Skipping slope      | .092 (.049)                             | .000 (.060)         | .000 (.060)                             | GPA intercept      | <b>-.092 (.036)</b>             |                     |                     |                                      |                                         |                                   |                     |                                                        |                     |                     |                   |                                         |                     |                                         |                     |                     |                    |                     |                     |                     |                                         |                     |                     |                                   |                     |                    |                     |                                                        |                    |                                   |                    |                                                        |                     |              |                 |                     |                     |                |               |                     |                    |                |                     |             |
| Male                                | <i>(Direct)</i>                                        |                     | <b>-.201 (.042)</b> | <b>.043 (.014)</b>  | <b>-.158 (.044)</b> |                                 |                    |                     |                     |                     |                                         |                    |                                   |                     |                                                        |                                   |                                         |                                     |                     |                     |                                         |                    |                                   |                     |                     |                                         |                     |                                         |                    |                                 |                     |                     |                                      |                                         |                                   |                     |                                                        |                     |                     |                   |                                         |                     |                                         |                     |                     |                    |                     |                     |                     |                                         |                     |                     |                                   |                     |                    |                     |                                                        |                    |                                   |                    |                                                        |                     |              |                 |                     |                     |                |               |                     |                    |                |                     |             |
|                                     | Marijuana intercept, Marijuana slope                   |                     | -.006 (.004)        |                     |                     |                                 |                    |                     |                     |                     |                                         |                    |                                   |                     |                                                        |                                   |                                         |                                     |                     |                     |                                         |                    |                                   |                     |                     |                                         |                     |                                         |                    |                                 |                     |                     |                                      |                                         |                                   |                     |                                                        |                     |                     |                   |                                         |                     |                                         |                     |                     |                    |                     |                     |                     |                                         |                     |                     |                                   |                     |                    |                     |                                                        |                    |                                   |                    |                                                        |                     |              |                 |                     |                     |                |               |                     |                    |                |                     |             |
|                                     | Skipping intercept, GPA intercept                      |                     | <b>.043 (.012)</b>  |                     |                     |                                 |                    |                     |                     |                     |                                         |                    |                                   |                     |                                                        |                                   |                                         |                                     |                     |                     |                                         |                    |                                   |                     |                     |                                         |                     |                                         |                    |                                 |                     |                     |                                      |                                         |                                   |                     |                                                        |                     |                     |                   |                                         |                     |                                         |                     |                     |                    |                     |                     |                     |                                         |                     |                     |                                   |                     |                    |                     |                                                        |                    |                                   |                    |                                                        |                     |              |                 |                     |                     |                |               |                     |                    |                |                     |             |
|                                     | Marijuana intercept, Skipping intercept, GPA intercept |                     | <b>.006 (.002)</b>  |                     |                     |                                 |                    |                     |                     |                     |                                         |                    |                                   |                     |                                                        |                                   |                                         |                                     |                     |                     |                                         |                    |                                   |                     |                     |                                         |                     |                                         |                    |                                 |                     |                     |                                      |                                         |                                   |                     |                                                        |                     |                     |                   |                                         |                     |                                         |                     |                     |                    |                     |                     |                     |                                         |                     |                     |                                   |                     |                    |                     |                                                        |                    |                                   |                    |                                                        |                     |              |                 |                     |                     |                |               |                     |                    |                |                     |             |
| White                               | <i>(Direct)</i>                                        |                     | <b>.141 (.051)</b>  | <b>-.228 (.037)</b> | -.087 (.067)        |                                 |                    |                     |                     |                     |                                         |                    |                                   |                     |                                                        |                                   |                                         |                                     |                     |                     |                                         |                    |                                   |                     |                     |                                         |                     |                                         |                    |                                 |                     |                     |                                      |                                         |                                   |                     |                                                        |                     |                     |                   |                                         |                     |                                         |                     |                     |                    |                     |                     |                     |                                         |                     |                     |                                   |                     |                    |                     |                                                        |                    |                                   |                    |                                                        |                     |              |                 |                     |                     |                |               |                     |                    |                |                     |             |
|                                     | GPA intercept                                          |                     | <b>-.228 (.037)</b> |                     |                     |                                 |                    |                     |                     |                     |                                         |                    |                                   |                     |                                                        |                                   |                                         |                                     |                     |                     |                                         |                    |                                   |                     |                     |                                         |                     |                                         |                    |                                 |                     |                     |                                      |                                         |                                   |                     |                                                        |                     |                     |                   |                                         |                     |                                         |                     |                     |                    |                     |                     |                     |                                         |                     |                     |                                   |                     |                    |                     |                                                        |                    |                                   |                    |                                                        |                     |              |                 |                     |                     |                |               |                     |                    |                |                     |             |
| Parents' Education                  | Skipping slope                                         |                     | .092 (.049)         | .000 (.060)         | .000 (.060)         |                                 |                    |                     |                     |                     |                                         |                    |                                   |                     |                                                        |                                   |                                         |                                     |                     |                     |                                         |                    |                                   |                     |                     |                                         |                     |                                         |                    |                                 |                     |                     |                                      |                                         |                                   |                     |                                                        |                     |                     |                   |                                         |                     |                                         |                     |                     |                    |                     |                     |                     |                                         |                     |                     |                                   |                     |                    |                     |                                                        |                    |                                   |                    |                                                        |                     |              |                 |                     |                     |                |               |                     |                    |                |                     |             |
|                                     | GPA intercept                                          | <b>-.092 (.036)</b> |                     |                     |                     |                                 |                    |                     |                     |                     |                                         |                    |                                   |                     |                                                        |                                   |                                         |                                     |                     |                     |                                         |                    |                                   |                     |                     |                                         |                     |                                         |                    |                                 |                     |                     |                                      |                                         |                                   |                     |                                                        |                     |                     |                   |                                         |                     |                                         |                     |                     |                    |                     |                     |                     |                                         |                     |                     |                                   |                     |                    |                     |                                                        |                    |                                   |                    |                                                        |                     |              |                 |                     |                     |                |               |                     |                    |                |                     |             |

| Explanatory Variable                | Mediating Path(s)                                      | Outcome Variable   | Specific Effect     | Total Indirect      | Total Effect        |
|-------------------------------------|--------------------------------------------------------|--------------------|---------------------|---------------------|---------------------|
| Sensation-Seeking                   | <i>(Direct)</i>                                        | GPA slope          | <b>-.027 (.010)</b> | <b>.028 (.006)</b>  | .000 (.012)         |
|                                     | GPA intercept                                          |                    | <b>.028 (.006)</b>  |                     |                     |
| Depressive Symptoms                 | Marijuana intercept, Marijuana slope                   |                    | .000 (.000)         |                     |                     |
|                                     | Skipping intercept, GPA intercept                      |                    | <b>.002 (.001)</b>  | .002 (.001)         | .002 (.001)         |
|                                     | Marijuana intercept, Skipping intercept, GPA intercept |                    | .000 (.000)         |                     |                     |
| Anxiety Symptoms                    | Marijuana intercept, Marijuana slope                   |                    | .000 (.000)         |                     |                     |
|                                     | Skipping intercept, GPA intercept                      |                    | -.001 (.001)        | -.001 (.001)        | -.001 (.001)        |
|                                     | Marijuana intercept, Skipping intercept, GPA intercept |                    | .000 (.000)         |                     |                     |
| Behavioral Dysregulation            | Skipping intercept, GPA intercept                      |                    | <b>.001 (.000)</b>  | <b>.001 (.000)</b>  | <b>.001 (.000)</b>  |
| Living-Learning Program Involvement | <i>(Direct)</i>                                        |                    | <b>-.096 (.044)</b> | <b>-.153 (.030)</b> | <b>-.249 (.058)</b> |
|                                     | GPA intercept                                          |                    | <b>-.153 (.030)</b> |                     |                     |
| Other Extracurricular Involvement   | Marijuana intercept, Marijuana slope                   |                    | .001 (.001)         |                     |                     |
|                                     | Skipping intercept, GPA intercept                      |                    | <b>-.004 (.002)</b> | <b>-.004 (.002)</b> | <b>-.004 (.002)</b> |
|                                     | Marijuana intercept, Skipping intercept, GPA intercept |                    | <b>-.001 (.000)</b> |                     |                     |
| Fraternity/Sorority Involvement     | Marijuana slope                                        |                    | -.015 (.009)        |                     |                     |
|                                     | Skipping intercept, GPA intercept                      |                    | <b>.028 (.009)</b>  | .013 (.014)         | .013 (.014)         |
|                                     | Marijuana slope                                        |                    | .017 (.011)         |                     |                     |
| Other Drug Use                      | Marijuana intercept, Marijuana slope                   |                    | -.011 (.009)        | <b>.027 (.008)</b>  | <b>.027 (.008)</b>  |
|                                     | Skipping intercept, GPA intercept                      |                    | .009 (.005)         |                     |                     |
|                                     | Marijuana intercept, Skipping intercept, GPA intercept |                    | <b>.011 (.004)</b>  |                     |                     |
|                                     | Marijuana slope                                        | .003 (.002)        |                     |                     |                     |
| Alcohol Frequency                   | Marijuana intercept, Marijuana slope                   | -.001 (.001)       | <b>.003 (.001)</b>  | <b>.003 (.001)</b>  |                     |
|                                     | Marijuana intercept, Skipping intercept, GPA intercept | <b>.001 (.000)</b> |                     |                     |                     |
|                                     | Marijuana slope                                        | -.003 (.002)       |                     |                     |                     |
| Alcohol Quantity                    | Skipping intercept, GPA intercept                      | <b>.004 (.002)</b> | .001 (.003)         | .001 (.003)         |                     |

| Explanatory Variable                                              | Mediating Path(s)                                                 | Outcome Variable    | Specific Effect     | Total Indirect      | Total Effect       |
|-------------------------------------------------------------------|-------------------------------------------------------------------|---------------------|---------------------|---------------------|--------------------|
| Male                                                              | Skipping intercept                                                | Time to Graduation  | <b>.026 (.013)</b>  | <b>.159 (.032)</b>  | <b>.159 (.032)</b> |
|                                                                   | GPA slope                                                         |                     | <b>.097 (.029)</b>  |                     |                    |
|                                                                   | Marijuana intercept, Skipping intercept                           |                     | .004 (.002)         |                     |                    |
|                                                                   | Skipping intercept, GPA intercept                                 |                     | <b>.047 (.013)</b>  |                     |                    |
|                                                                   | Marijuana intercept, Skipping intercept, GPA intercept            |                     | <b>.007 (.003)</b>  |                     |                    |
|                                                                   | Marijuana intercept, Marijuana slope, GPA slope                   |                     | .003 (.002)         |                     |                    |
|                                                                   | Skipping intercept, GPA intercept, GPA slope                      |                     | <b>-.021 (.007)</b> |                     |                    |
| White                                                             | Marijuana intercept, Skipping intercept, GPA intercept, GPA slope | <b>-.003 (.001)</b> |                     |                     |                    |
|                                                                   | GPA intercept                                                     | <b>-.247 (.043)</b> |                     |                     |                    |
|                                                                   | GPA slope                                                         | <b>-.068 (.030)</b> | <b>-.205 (.033)</b> | <b>-.205 (.033)</b> |                    |
| Parents' Education                                                | GPA intercept, GPA slope                                          | <b>.109 (.029)</b>  |                     |                     |                    |
|                                                                   | Skipping slope                                                    | .048 (.028)         | -.051 (.026)        | -.051 (.026)        |                    |
|                                                                   | GPA intercept                                                     | <b>-.099 (.039)</b> |                     |                     |                    |
| Skipping slope, GPA slope                                         | -.044 (.026)                                                      |                     |                     |                     |                    |
| Sensation-Seeking                                                 | GPA intercept, GPA slope                                          | <b>.044 (.019)</b>  |                     |                     |                    |
|                                                                   | GPA intercept                                                     | <b>.030 (.007)</b>  | <b>.030 (.006)</b>  | <b>.030 (.006)</b>  |                    |
|                                                                   | GPA slope                                                         | <b>.013 (.005)</b>  |                     |                     |                    |
| GPA intercept, GPA slope                                          | <b>-.013 (.004)</b>                                               |                     |                     |                     |                    |
| Depressive Symptoms                                               | Skipping intercept                                                | .001 (.001)         | <b>.003 (.001)</b>  | <b>.003 (.001)</b>  |                    |
|                                                                   | Marijuana intercept, Skipping intercept                           | .000 (.000)         |                     |                     |                    |
|                                                                   | Skipping intercept, GPA intercept                                 | .002 (.001)         |                     |                     |                    |
|                                                                   | Marijuana intercept, Skipping intercept, GPA intercept            | .000 (.000)         |                     |                     |                    |
|                                                                   | Marijuana intercept, Marijuana slope, GPA slope                   | .000 (.000)         |                     |                     |                    |
|                                                                   | Skipping intercept, GPA intercept, GPA slope                      | -.001 (.001)        |                     |                     |                    |
| Marijuana intercept, Skipping intercept, GPA intercept, GPA slope | .000 (.000)                                                       |                     |                     |                     |                    |

| Explanatory Variable                | Mediating Path(s)                                                 | Outcome Variable    | Specific Effect     | Total Indirect      | Total Effect        |
|-------------------------------------|-------------------------------------------------------------------|---------------------|---------------------|---------------------|---------------------|
| Anxiety Symptoms                    | Skipping intercept                                                | Time to Graduation  | -.001 (.001)        | <b>-.002 (.001)</b> | <b>-.002 (.001)</b> |
|                                     | Marijuana intercept, Skipping intercept                           |                     | .000 (.000)         |                     |                     |
|                                     | Skipping intercept, GPA intercept                                 |                     | -.002 (.001)        |                     |                     |
|                                     | Marijuana intercept, Skipping intercept, GPA intercept            |                     | .000 (.000)         |                     |                     |
|                                     | Marijuana intercept, Marijuana slope, GPA slope                   |                     | .000 (.000)         |                     |                     |
|                                     | Skipping intercept, GPA intercept, GPA slope                      |                     | .001 (.000)         |                     |                     |
|                                     | Marijuana intercept, Skipping intercept, GPA intercept, GPA slope |                     | .000 (.000)         |                     |                     |
| Behavioral Dysregulation            | Skipping intercept                                                | .001 (.000)         | <b>.001 (.000)</b>  | <b>.001 (.000)</b>  |                     |
|                                     | Skipping intercept, GPA intercept                                 | <b>.001 (.000)</b>  |                     |                     |                     |
|                                     | Skipping intercept, GPA intercept, GPA slope                      | <b>.000 (.000)</b>  |                     |                     |                     |
| Living-Learning Program Involvement | GPA intercept                                                     | <b>-.166 (.032)</b> | -.046 (.026)        | -.046 (.026)        |                     |
|                                     | GPA slope                                                         | <b>.046 (.023)</b>  |                     |                     |                     |
|                                     | GPA intercept, GPA slope                                          | <b>.073 (.019)</b>  |                     |                     |                     |
| Other Extracurricular Involvement   | Skipping intercept                                                | -.003 (.002)        | <b>-.006 (.002)</b> | <b>-.006 (.002)</b> |                     |
|                                     | Marijuana intercept, Skipping intercept                           | .000 (.000)         |                     |                     |                     |
|                                     | Skipping intercept, GPA intercept                                 | <b>-.005 (.002)</b> |                     |                     |                     |
|                                     | Marijuana intercept, Skipping intercept, GPA intercept            | <b>-.001 (.000)</b> |                     |                     |                     |
|                                     | Marijuana intercept, Marijuana slope, GPA slope                   | .000 (.000)         |                     |                     |                     |
|                                     | Skipping intercept, GPA intercept, GPA slope                      | .002 (.001)         |                     |                     |                     |
|                                     | Marijuana intercept, Skipping intercept, GPA intercept, GPA slope | .000 (.000)         |                     |                     |                     |
| Fraternity/Sorority Involvement     | Skipping intercept                                                | .017 (.009)         | <b>.041 (.012)</b>  | <b>.041 (.012)</b>  |                     |
|                                     | Skipping intercept, GPA intercept                                 | <b>.030 (.010)</b>  |                     |                     |                     |
|                                     | Marijuana slope, GPA slope                                        | .007 (.005)         |                     |                     |                     |
|                                     | Skipping intercept, GPA intercept, GPA slope                      | <b>-.013 (.005)</b> |                     |                     |                     |

| Explanatory Variable | Mediating Path(s)                                                 | Outcome Variable    | Specific Effect     | Total Indirect     | Total Effect       |
|----------------------|-------------------------------------------------------------------|---------------------|---------------------|--------------------|--------------------|
| Other Drug Use       | Skipping intercept                                                | Time to Graduation  | .006 (.004)         | <b>.022 (.008)</b> | <b>.022 (.008)</b> |
|                      | Marijuana intercept, Skipping intercept                           |                     | .007 (.004)         |                    |                    |
|                      | Skipping intercept, GPA intercept                                 |                     | .010 (.006)         |                    |                    |
|                      | Marijuana slope, GPA slope                                        |                     | -.008 (.006)        |                    |                    |
|                      | Marijuana intercept, Skipping intercept, GPA intercept            |                     | <b>.012 (.005)</b>  |                    |                    |
|                      | Marijuana intercept, Marijuana slope, GPA slope                   |                     | .005 (.005)         |                    |                    |
|                      | Skipping intercept, GPA intercept, GPA slope                      |                     | -.004 (.003)        |                    |                    |
|                      | Marijuana intercept, Skipping intercept, GPA intercept, GPA slope | <b>-.006 (.002)</b> |                     |                    |                    |
| Alcohol Frequency    | Marijuana intercept, Skipping intercept                           |                     | .001 (.000)         | .001 (.001)        | .001 (.001)        |
|                      | Marijuana slope, GPA slope                                        |                     | -.001 (.001)        |                    |                    |
|                      | Marijuana intercept, Skipping intercept, GPA intercept            |                     | <b>.001 (.000)</b>  |                    |                    |
|                      | Marijuana intercept, Marijuana slope, GPA slope                   |                     | .001 (.000)         |                    |                    |
|                      | Marijuana intercept, Skipping intercept, GPA intercept, GPA slope |                     | <b>-.001 (.000)</b> |                    |                    |
| Alcohol Quantity     | Skipping intercept                                                |                     | .002 (.001)         | <b>.006 (.002)</b> | <b>.006 (.002)</b> |
|                      | Skipping intercept, GPA intercept                                 |                     | <b>.004 (.002)</b>  |                    |                    |
|                      | Marijuana slope, GPA slope                                        |                     | .002 (.001)         |                    |                    |
|                      | Skipping intercept, GPA intercept, GPA slope                      |                     | -.002 (.001)        |                    |                    |

*Note.* Statistically significant results ( $p < .05$ ) are shown in **bold**. All paths [ $b(SE)$ ] are structure coefficients. All direct paths were estimated by maximum likelihood methods, while the direct and total effects were estimated using Monte Carlo bootstrapping estimation. See text for details. Results adjusted for all effects in the final model, including those shown in Figure 2 and Table 3.
